# Supplementary material for: Fear of COVID-19 for Individuals and Family Members: Indications from the National Cross-Sectional Study of the EPICOVID19 Web-Based Survey
Source: PubMed Central journal article supplement (PMC8003842; doi:10.3390/ijerph18063248), 2021-03-21
Supplement: ijerph-18-03248-s001.pdf [file ijerph-18-03248-s001.pdf]

## CLINICAL EVALUATION

**9. Did you have one or more of the following symptoms since the 1st of February 2020? \***

- Fever with a temperature greater than 37.5 °C for at least three consecutive days
- Cough
- Sore throat/rhinorrea
- Headache
- Myalgia
- Olfactory or taste disorders
- Shortness of breath
- Chest pain
- Feelings of having a fast-beating
- Gastrointestinal disorders (diarrhoea, nausea, vomiting)
- Conjunctivitis
- Pneumoniae

**10. If you had at least one of the symptoms above, please indicate in which month they occurred for the first time \***

- February
- March
- April

**11. Have you ever been diagnosed with one or more of the following conditions?**

- Lung diseases (e.g. asthma, obstructive pulmonary disease)
- Heart diseases (e.g. ischemic heart disease, atrial fibrillation)
- Hypertension
- Kidney diseases
- Immune system diseases (e.g. thyroid disease, psoriasis, rheumatoid arthritis)
- Tumours
- Metabolic diseases (e.g. diabetes, obesity, gout)
- Liver diseases (e.g. hepatitis, cirrhosis, liver failure)
- Depression and/or anxiety

**12. Please indicate other conditions**

- Surgical procedures under general anaesthesia during the last year
- Transplants
- Allergies
- Pregnancy
- Non self-sufficient in carrying out daily activities
- Healthcare workers (e.g. clinicians, nurses, rescuer, pharmacist)

**13. Did you carry out the following vaccinations?\***

- Flu shot during the last autumn  Yes  No
- Anti-pneumococcal in the last 12 months  Yes  No
- Other vaccinations in the last 12 months  Yes  No

**14. Do you regularly take one or more of the following medicines?**

- Aspirin
- Anti-hypertensive
- Hypocholesterolemic drugs
- Anti-diabetics
- Anti-cancer drugs
- Corticosteroids
- Thyroid drugs (e.g. euthyrox)
- Anti-inflammatory drugs
- Anxiety medications and/or sedatives
- Anti-depressant
- Supplements (e.g. vitamins)

*If females*

**15. Have you ever been taking birth pills and/or hormone replacement therapy?\***

- No
- Yes, in the past, for less than 5 years
- Yes, in the past, for more than 5 years
- Yes currently, taking it less than 5 years
- Yes currently, taking it more than 5 years

**16. Indicate the number of completed pregnancies\***

- 0
- 1
- 2
- 3 or more

**17. Have you been in a close contact (direct contact at a distance of less than 2 meters, or in a closed environment such as a house, workplace, transportation vehicles) with confirmed COVID-19 cases, live or deceased?\***

- Yes  No

**18. Have you been in a close contact (direct contact at a distance of less than 2 meters, or in a closed environment such as a house, workplace, transportation vehicles) with suspected COVID-19 cases, live or deceased?\***

- Yes  No  I don't know

**19. Did you contact the emergency number and/or the general practitioner to report any symptoms of suspected infection by COVID-19?\***

- No
- No but I went to the hospital on my own initiative
- Yes, and they suggested to me isolation
- Yes, and they did not suggest to me isolation
- Yes, and I was sent to the hospital

**20. Have you been tested for COVID-19? \***

- Yes, with a positive result
- Yes, with a negative result
- Yes, but I do not know the result
- No, I did not perform any test

**21. Have you been hospitalized due to COVID-19, either as a suspected or as a confirmed case?\***

- Yes  No

**22. Please indicate other elements that might be of relevance for COVID-19**

---

---

**PERSONAL CHARACTERISTICS AND HEALTH STATUS**

**23. How would you describe your health in general?\***

Very bad  Bad  Adequate  Good  Very good

**24. Do you fear getting infected with the coronavirus (COVID-19)?\***

No  
 Just a little bit  
 Neutral  
 Quite enough  
 Yes, a lot

**25. Do you fear your family being infected with the coronavirus (COVID-19)?\***

No  
 Just a little bit  
 Neutral  
 Quite enough  
 Yes, a lot

**HOUSING CONDITIONS**

**26. Your home is located in:\***

City centre with more than 100.000 inhabitants  
 Suburbs of cities with more than 100.000 inhabitants  
 Small town  
 Countryside

**27. Your home is located in an area where the road traffic is:\***

Intense (living near a busy road)  
 Moderate  
 Low

**28. How many rooms there are in your home (excluding the bathroom and auxiliary spaces)?\***

One  Two  Three  More than three

**29. Besides you, how many people live in your household?\***

None  One  Two  More than two

**30. Are there in the same household elderly persons or anyone with immunocompromising or chronic disease conditions?\***

Yes  No

**LIFESTYLE**

**31. How many people have you been in contact with in average, prior to the Governmental restrictions on lockdown?\***

Less than 10  Between 10 and 100  More than 100

**32. Do you smoke?\***

I have never smoked or I smoked less than 100 cigarettes in my lifetime

I am a former smoker (I have smoked at least 100 cigarettes in my lifetime and I do not smoke anymore)

Yes, smoking less than 10 cigarettes per day

Yes, smoking between 10 and 20 cigarettes per day

Yes, smoking more than 20 cigarettes per day (more than one pack per day)

*If former smoker*

**33. How many year have you smoked?\***

*If current smoker*

**34. How many years?\***

**35. Prior to the lockdown by the Governmental restrictions, for how long did you follow a regular routine of moderate or intense physical activity (swimming, racing)?\***

Not doing any physical activity or doing it for less than 10 minutes per week

Between 10 minutes and two hours and half per week

More than two hours and half per week

### BEHAVIOURS FOLLOWING THE LOCKDOWN

**36. Please indicate your employment status following the restrictions introduced by the Italian Government since March, 9th 2020 \***

Continued going to work at my workplace

Working from home

I had to stop working due to the emergency

I am not employed

**37. Since March, 9th 2020, how many times do you go out during a week? \***

Never

1

2-3

4-5

6 or more

**38. Since March, 9th 2020, do you use public transport go to work or to provide supplies\***

No, never

Yes, 1-3 times per week

Yes, 4-6 times per week

Yes, 7 or more times per week

**Any additional information and comments**

---

---

---
